# Supplementary material
Source: publisher figshare collection journal article supplement (https://tandf.figshare.com/ndownloader/files/22054839)
Supplement: Supplementary file 1 [file 22054839]

### 1. Proof of Lemma 4.3

For  $k \geq 0$ ,  $(T1^k(T_u), T2^k(T_u), T3^k(T_u))$  is the triad obtained from optimal feasible solution  $X^k(T_u)$  of problem  $(TMP3)^k(T_u)$ .

By construction of  $(TMP3)^k(T_u)$ , it is clear that  $T1^k(T_u) < T_u, \forall k \geq 1$ .

In order to prove relation (4), note that for a triad  $(T1^k(T_u), T2^k(T_u), T3^k(T_u))$ ,  $k \geq 0$ , the next triad  $(T1^{k+1}(T_u), T2^{k+1}(T_u), T3^{k+1}(T_u))$  is obtained from an optimal feasible solution  $X^{k+1}(T_u)$  of TMTP  $(TMP3)^{k+1}(T_u)$  or  $(TMP3)^{k(\delta^*)}(T_u)$  for some value of  $\delta = \delta^*$ .

If  $T2^k(T_u) = t_2^{\beta_k}$ ,  $1 \leq \beta_k \leq \beta$ , then the problem  $(TMP3)^{k+1}(T_u)$  is

$$(TMP3)^{k+1}(T_u) \quad \min_{X \in \hat{S}} \max_{I_O \times I_T} (t'_{ij} : x_{ij} > 0)$$

where

$$t'_{ij} = \begin{cases} \begin{cases} 0 & \text{if } t_{ij} \leq T_u \\ M & \text{if } t_{ij} \geq T_u \end{cases} & \text{for } (i, j) \in P_1 \\ \begin{cases} 0 & \text{if } t_{ij} \leq t_2^{\beta_k - \delta^*} \\ M & \text{if } t_{ij} > t_2^{\beta_k - \delta^*} \end{cases} & \text{for } (i, j) \in P_2 \\ \begin{cases} t_{ij} & \text{if } t_{ij} < T2^k(T_u) + T3^k(T_u) - t_2^{\beta_k - \delta^*} \\ M & \text{if } t_{ij} \geq T2^k(T_u) + T3^k(T_u) - t_2^{\beta_k - \delta^*} \end{cases} & \text{for } (i, j) \in P_3 \end{cases}$$

and  $\hat{S}$  is same as defined in (2).

Clearly,  $T2^{k+1}(T_u) \leq t_2^{\beta_k - \delta^*} < t_2^{\beta_k} = T2^k(T_u), \forall k \geq 1$ .

$$\Rightarrow T2^{k+1}(T_u) < T2^k(T_u) \forall k \geq 0$$

which proves the relation (4).

Next, for proving the relation (5), suppose  $T3^{k+1}(T_u) < T3^k(T_u)$  for some  $k = \bar{k} \in \{0, 1, 2, \dots, s-1\}$ , i.e.,  $T3(\bar{k}+1) < T3(\bar{k})$  where  $\bar{k} \in \{1, 2, \dots, s-1\}$ .

Then  $X(\bar{k}+1)$  yields the triad  $(T1(\bar{k}+1), T2(\bar{k}+1), T3(\bar{k}+1))$  having  $T1(\bar{k}+1) < T_u$ ,  $T2(\bar{k}+1) < T2(\bar{k})$  and  $T3(\bar{k}+1) < T3(\bar{k})$ .

Therefore, by construction of  $(TMP3)^{\bar{k}}(T_u)$ , it follows that  $X(\bar{k}+1)$  is a restricted feasible solution of the problem  $(TMP3)^{\bar{k}}(T_u)$  yielding Phase-3 time as  $T3(\bar{k}+1) < T3(\bar{k})$ , a contradiction to the optimality of  $X(\bar{k})$  (yielding Phase-3 time as  $T3(\bar{k})$ ) for the problem  $(TMP3)^{\bar{k}}(T_u)$ .

Hence,  $T3^{k+1}(T_u) \geq T3^k(T_u) \forall k \geq 1$  and the relation (5) follows.

Next, for any  $k \in \{1, 2, \dots, s-1\}$ ,

$$\begin{aligned} T2^{k+1}(T_u) &\leq t_2^{\beta_k - \delta^*} \\ \text{and } T3^{k+1}(T_u) &< T2^k(T_u) + T3^k(T_u) - t_2^{\beta_k - \delta^*} \\ \Rightarrow T2^{k+1}(T_u) + T3^{k+1}(T_u) &< T2^k(T_u) + T3^k(T_u) \forall k \geq 1 \end{aligned}$$

and hence, the relation (6) also follows.

## 2. Proof of Theorem 4.4

Suppose there exist a feasible solution  $X^*$  of 3-PhTP with corresponding triad  $(T1^*, T2^*, T3^*)$  such that  $T2^* + T3^* < T2^s(T_u) + T3^s(T_u)$  and  $T1^* < T_u$ .

In view of relation (4) of lemma 4.3,

$$T2(0) > T2(1) > T2(2) > \dots > T2^s(T_u)$$

Three cases arise.

**Case 1.**  $T2^* > T2(0)$ .

Since,  $T2^* + T3^* < T2^s(T_u) + T3^s(T_u) < T2(0) + T3(0)$  (using Lemma 4.3), it follows that  $T3^* < T3(0)$ .

Also  $T1^* < T_u$ .

$X^*$  is a restricted feasible solution of the problem  $(TMP3)^0(T_u)$  yielding optimal value as  $T3^* < T3(0)$ . But  $X(0)$  is an optimal feasible solution of TMTP  $(TMP3)^0(T_u)$ , a contradiction.

**Case 2.**  $T2^* < T2^s(T_u)$ .

If  $T2^s(T_u) = T2^{min}$ , then  $T2^* < T2^s(T_u)$  is not possible, as  $T2^{min}$  is the minimum time of Phase-2.

Therefore  $T2^s(T_u) > T2^{min}$ .

Since  $T1^* < T_u$ ,  $T2^* < T2^s(T_u)$  and  $T2^* + T3^* < T2^s(T_u) + T3^s(T_u)$ , it follows that  $X^*$  must be a restricted feasible solution of one of the problems of the collection  $(TMP3)^{s(\delta)}(T_u)$ ,  $\delta = 1, 2, \dots$ .

But this is a contradiction as  $(T1^s(T_u), T2^s(T_u), T3^s(T_u))$  is the last triad of the sequence and none of the problems of the collection  $(TMP3)^{s(\delta)}(T_u)$  is restricted feasible.

**Case 3.**  $T2^s(T_u) \leq T2^* \leq T2(0)$ .

In this case, two possibilities arise.

*Possibility (a).*

$$T2^* = T2(\bar{k}) \text{ for some } \bar{k} \in \{0, 1, 2, \dots, s\}$$

$$\text{Since, } T2^* + T3^* < T2^s(T_u) + T3^s(T_u) < T2(\bar{k}) + T3(\bar{k})$$

$$\Rightarrow T3^* < T3(\bar{k}) < T2(\bar{k} - 1) + T3(\bar{k} - 1) - t_2^{\beta_{\bar{k}-1} - \delta^*}$$

$$\text{Also, } T2^* = T2(\bar{k}) \leq t_2^{\beta_{\bar{k}-1} - \delta^*} \text{ and } T1^* < T_u$$

$\Rightarrow X^*$  is a restricted feasible solution of TMTP  $(TMP3)^{\bar{k}}(T_u)$  providing objective function value as  $T3^* < T3(\bar{k})$ , a contradiction to the fact that  $X(\bar{k})$  is an optimal feasible solution for the TMTP  $(TMP3)^{\bar{k}}(T_u)$ .

*Possibility (b).*

$$T2(\bar{k} + 1) < T2^* < T2(\bar{k}) \text{ for some } \bar{k} \in \{0, 1, 2, \dots, s - 1\}$$

$$\text{Since } T2^* + T3^* < T2^s(T_u) + T3^s(T_u) \leq T2(\bar{k} + 1) + T3(\bar{k} + 1)$$

$$\Rightarrow T3^* < T3(\bar{k} + 1) \text{ (as } T2^* > T2(\bar{k} + 1))$$

Now  $(T1(\bar{k} + 1), T2(\bar{k} + 1), T3(\bar{k} + 1))$  is a triad of Phase-1, Phase-2 and Phase-3 shipment times yielded from an optimal solution  $X(\bar{k} + 1)$  of TMTP  $(TMP3)^{\bar{k}+1}(T_u)$

which is the first restricted feasible problem  $(TMP3)^{\bar{k}(\delta^*)}(T_u)$  in the collection  $(TMP3)^{\bar{k}(\delta)}(T_u)$  of problems solved successively by taking values of  $\delta = 1, 2, \dots$  and so on.

Further  $T2(\bar{k} + 1) < T2^* < T2(\bar{k})$ ,

$T2^* + T3^* < T2(\bar{k}) + T3(\bar{k})$ ,

$T1^* < T_u$

$\Rightarrow X^*$  must be a restricted feasible solution of one of the problems  $(TMP3)^{\bar{k}(\delta)}(T_u)$  for  $\delta = 1, 2, \dots, \delta^*$ , i.e.,  $X^*$  must be a restricted feasible solution of one of the problems  $(TMP3)^{\bar{k}(1)}(T_u)$  to  $(TMP3)^{\bar{k}(\delta^*)}(T_u)$ .

$X^*$  cannot be a restricted feasible solution of any of the problems  $(TMP3)^{\bar{k}(1)}(T_u)$  to  $(TMP3)^{\bar{k}(\delta^*-1)}(T_u)$ , as  $(TMP3)^{\bar{k}(\delta^*)}(T_u)$  is the first restricted feasible problem among the problems  $(TMP3)^{\bar{k}(\delta)}(T_u)$ .

Therefore,  $X^*$  must be a restricted feasible solution of the problem  $(TMP3)^{\bar{k}(\delta^*)}(T_u)$  yielding triad  $(T1^*, T2^*, T3^*)$  with  $T3^* < T3(\bar{k} + 1)$ , which is a contradiction to the optimality of  $X(\bar{k} + 1)$  for the problem  $(TMP3)^{\bar{k}(\delta^*)}(T_u)$ .

### 3. Proof of Lemma 4.5

Since  $(T1^{prof}(l + 1), T2^{prof}(l + 1), T3^{prof}(l + 1))$  is a proficient triad with respect to Phase-1 under the restriction that Phase-1 time is strictly less than  $T1^{prof}(l)$ ,  $\forall l = 1, 2, \dots, v$ , therefore

$$T1^{prof}(l) > T1^{prof}(l + 1) \quad \forall l \geq 0$$

and hence the relations (7) follow.

In order to prove relation (8), let, if possible, there exist  $\bar{l} \in \{0, 1, 2, \dots, v\}$  such that

$$T2^{prof}(\bar{l} + 1) + T3^{prof}(\bar{l} + 1) < T2^{prof}(\bar{l}) + T3^{prof}(\bar{l})$$

Note that  $T1^{prof}(\bar{l} + 1) < T1^{prof}(\bar{l}) < T1^{prof}(\bar{l} - 1)$

This contradicts the fact that  $T2^{prof}(\bar{l}) + T3^{prof}(\bar{l})$  is the minimum sum of Phase-2 and Phase-3 shipment times under the restriction that Phase-1 time is strictly less than  $T1^{prof}(\bar{l} - 1)$  (Ref. Theorem 4.4).

### 4. Proof of Theorem 4.6

Let, if possible, there exist a feasible solution  $X^*$  of 3-PhTP yielding the triad  $(T1^*, T2^*, T3^*)$  with  $T1^* + T2^* + T3^* < \min_{\{l=1,2,\dots,v\}} [T1^{prof}(l) + T2^{prof}(l) + T3^{prof}(l)]$ .

Then, depending on the value of  $T1^*$ , following three cases arise:

**Case 1.**  $T1^* > T1^{prof}(0)$

$$T1^* + T2^* + T3^* < \min_{\{l=1,2,\dots,v\}} [T1^{prof}(l) + T2^{prof}(l) + T3^{prof}(l)]$$

$$\Rightarrow T1^* + T2^* + T3^* < T1^{prof}(0) + T2^{prof}(0) + T3^{prof}(0)$$

Since  $T1^* > T1^{prof}(0) \Rightarrow T2^* + T3^* < T2^{prof}(0) + T3^{prof}(0)$

This implies that  $X^*$  is a feasible solution of 3-PhTP yielding sum of Phase-2 and Phase-3 shipment times strictly less than  $T2^{prof}(0) + T3^{prof}(0)$ , which is a contradiction, as  $T2^{prof}(0) + T3^{prof}(0)$  is the minimum sum of shipment times of Phase-2 and Phase-3 (Ref. Theorem 4.4 and Remark 3).

**Case 2.**  $T1^* < T1^{prof}(v)$

From Algorithm, it is clear that  $T1^{prof}(v) = T1^{min}$ .  
Therefore,  $T1^* < T1^{prof}(v)$  is not possible.

**Case 3.**  $T1^{prof}(v) \leq T1^* \leq T1^{prof}(0)$

Two sub cases arise:

*Sub case (i)*  $T1^* = T1^{prof}(\bar{l})$  for some  $\bar{l} \in \{0, 1, 2, \dots, v\}$ .

$$\text{Since } T1^* + T2^* + T3^* < \min_{\{l=1,2,\dots,v\}} [T1^{prof}(l) + T2^{prof}(l) + T3^{prof}(l)]$$

$$\Rightarrow T1^* + T2^* + T3^* < T1^{prof}(\bar{l}) + T2^{prof}(\bar{l}) + T3^{prof}(\bar{l})$$

$$\Rightarrow T2^* + T3^* < T2^{prof}(\bar{l}) + T3^{prof}(\bar{l})$$

This implies that  $X^*$  is a feasible solution of 3-PhTP yielding sum of shipment times of Phase-2 and Phase-3 strictly less than  $T2^{prof}(\bar{l}) + T3^{prof}(\bar{l})$  corresponding to Phase-1 time  $T1^* = T1^{prof}(\bar{l})$ , which is a contradiction to the fact that  $T2^{prof}(\bar{l}) + T3^{prof}(\bar{l})$  is the minimum sum of shipment times of Phase-2 and Phase-3 corresponding to Phase-1 time  $T1^{prof}(\bar{l})$  because of  $(T1^{prof}(\bar{l}), T2^{prof}(\bar{l}), T3^{prof}(\bar{l}))$  being a proficient triad with respect to Phase-1.

*Sub case (ii)*  $T1^{prof}(\bar{l} + 1) < T1^* < T1^{prof}(\bar{l})$  for some  $\bar{l} \in \{1, 2, \dots, v - 1\}$ .

$$\text{Since } T1^* + T2^* + T3^* < \min_{\{l=1,2,\dots,v\}} [T1^{prof}(l) + T2^{prof}(l) + T3^{prof}(l)]$$

$$\Rightarrow T1^* + T2^* + T3^* < T1^{prof}(\bar{l} + 1) + T2^{prof}(\bar{l} + 1) + T3^{prof}(\bar{l} + 1)$$

$$\Rightarrow T2^* + T3^* < T2^{prof}(\bar{l} + 1) + T3^{prof}(\bar{l} + 1) \text{ (as } T1^* > T1^{prof}(\bar{l} + 1))$$

Also  $T1^* < T1^{prof}(\bar{l})$ .

But  $T2^{prof}(\bar{l} + 1) + T3^{prof}(\bar{l} + 1)$  is the minimum sum of shipment times of Phase-2 and Phase-3 under the restriction that Phase-1 time is strictly less than  $T1^{prof}(\bar{l})$ , which is a contradiction.

## 5. Numerical Illustration

**Example 1.** Consider a balanced 3-PhTP (namely 3-PhTP(ex1) as in Table 1) with number of origins as  $m = 6$  and number of terminals as  $n = 8$  in the form of time matrix specifying the time of transportation of a homogeneous commodity via each origin-terminal link. The cells with underlined entries denote Phase-1 links, cells with shaded entries denote Phase-2 links and remaining cells correspond to Phase-3 links.

Table 1. 3-PhTP(ex1)

|       | $D_1$     | $D_2$     | $D_3$     | $D_4$     | $D_5$     | $D_6$     | $D_7$     | $D_8$     | $a_i$ |
|-------|-----------|-----------|-----------|-----------|-----------|-----------|-----------|-----------|-------|
| $S_1$ | <u>06</u> | 03        | 12        | <u>21</u> | 15        | 32        | 08        | 42        | 15    |
| $S_2$ | 40        | <u>04</u> | 29        | 03        | <u>23</u> | <u>17</u> | 03        | <u>06</u> | 10    |
| $S_3$ | 12        | 21        | 02        | 07        | 08        | 11        | <u>13</u> | 24        | 12    |
| $S_4$ | <u>08</u> | 05        | <u>09</u> | <u>04</u> | 09        | <u>15</u> | 37        | 09        | 06    |
| $S_5$ | 29        | 27        | 17        | 19        | <u>08</u> | 14        | 15        | <u>23</u> | 17    |
| $S_6$ | 11        | <u>35</u> | 42        | 05        | <u>27</u> | 32        | <u>35</u> | 27        | 20    |
| $b_j$ | 12        | 05        | 13        | 06        | 09        | 20        | 08        | 07        |       |

**Solution.** From Table 1, the parameters  $P_1$ ,  $P_2$  and  $P_3$  are noted as follows

$$P_1 = \left\{ \begin{array}{l} (1, 1), (1, 4), (2, 2), (2, 5), (2, 6), (2, 8), (3, 7), (4, 1), (4, 3), \\ (4, 4), (4, 6), (5, 5), (5, 8), (6, 2), (6, 5), (6, 7) \end{array} \right\}$$

$$P_2 = \left\{ \begin{array}{l} (1, 2), (1, 3), (1, 5), (2, 7), (3, 1), (3, 3), (3, 4), (3, 6), (4, 5), \\ (4, 8), (5, 2), (5, 3), (5, 7), (6, 6), (6, 8) \end{array} \right\}$$

$$P_3 = \left\{ \begin{array}{l} (1, 6), (1, 7), (1, 8), (2, 1), (2, 3), (2, 4), (3, 2), (3, 5), (3, 8), \\ (4, 2), (4, 7), (5, 1), (5, 4), (5, 6), (6, 1), (6, 3), (6, 4) \end{array} \right\}$$

The distinct time entries in three phases can be arranged in increasing order as follows.

**Phase-1:**  $t_1^1(= 04) < t_1^2(= 06) < t_1^3(= 08) < t_1^4(= 09) < t_1^5(= 13) < t_1^6(= 15) < t_1^7(= 17) < t_1^8(= 21) < t_1^9(= 23) < t_1^{10}(= 27) < t_1^{11}(= 35) = t_1^\alpha$ ;  $\alpha = 11$

**Phase-2:**  $t_2^1(= 02) < t_2^2(= 03) < t_2^3(= 07) < t_2^4(= 09) < t_2^5(= 11) < t_2^6(= 12) < t_2^7(= 15) < t_2^8(= 17) < t_2^9(= 27) < t_2^{10}(= 32) = t_2^\beta$ ;  $\beta = 10$

**Phase-3:**  $t_3^1(= 03) < t_3^2(= 05) < t_3^3(= 08) < t_3^4(= 11) < t_3^5(= 14) < t_3^6(= 19) < t_3^7(= 21) < t_3^8(= 24) < t_3^9(= 29) < t_3^{10}(= 32) < t_3^{11}(= 37) < t_3^{12}(= 40) < t_3^{13}(= 42)$ ;  $\gamma = 13$

**Solving 3-PhTP(ex1) by generating all proficient triads with respect to Phase-1:**

**Step 1.** On solving the standard TMTPs  $(TMP1)^0$  and  $(TMP2)^0$  (Table 2 and 3), the minimum shipment times of Phase-1 and Phase-2 are obtained as follows.

$$T1^{min} = 0 \text{ and } T2^{min} = 0$$

Table 2. TMTP  $(TMP1)^0$

|       | $D_1$ | $D_2$ | $D_3$ | $D_4$ | $D_5$ | $D_6$ | $D_7$ | $D_8$ | $a_i$ |
|-------|-------|-------|-------|-------|-------|-------|-------|-------|-------|
| $S_1$ |       | 0     | 0     |       |       | 7     | 3     |       | 15    |
|       | 06    | 00    | 00    | 21    | 00    | 00    | 00    | 00    |       |
| $S_2$ |       |       | 10    |       |       |       |       |       | 10    |
|       | 00    | 04    | 00    | 00    | 23    | 17    | 00    | 06    |       |
| $S_3$ |       |       | 3     | 6     | 3     |       |       |       | 12    |
|       | 00    | 00    | 00    | 00    | 00    | 00    | 13    | 00    |       |
| $S_4$ |       |       |       |       | 6     |       |       |       | 06    |
|       | 08    | 00    | 09    | 04    | 00    | 15    | 00    | 00    |       |
| $S_5$ | 12    |       |       |       |       |       | 5     |       | 17    |
|       | 00    | 00    | 00    | 00    | 08    | 00    | 00    | 23    |       |
| $S_6$ |       |       |       |       |       | 13    |       | 7     | 20    |
|       | 00    | 35    | 00    | 00    | 27    | 00    | 35    | 00    |       |
| $b_j$ | 12    | 05    | 13    | 06    | 09    | 20    | 08    | 07    |       |

Set  $t_1^0 = t_2^0 = t_3^0 = 0$ ,  $T_1^{prof}(0) = \infty$  and go to Step 2 for  $l = 0$ .

**Step 2.**  $T_1^{prof}(0) = \infty > T_1^{min} = 0$ , therefore go to Step 3.

**Step 3.** Set  $T_1^{prof}(0) = \infty = T_u$ . Solving the TMTP  $(TMP3)^0(T_u = \infty)$  (which is same as  $(TMP3)^0$ ), obtain an optimal feasible solution  $X^0(T_u = \infty)$  of problem  $(TMP3)^0(T_u = \infty)$  (Table 4) and corresponding optimal time as  $T_3^0(T_u = \infty) = 0$ . Obtain the corresponding Phase-1 and Phase-2 times as  $T_1^0(T_u = \infty) = 35$  and  $T_2^0(T_u = \infty) = 32$  respectively so that the first triad is  $(T_1^0(T_u = \infty), T_2^0(T_u = \infty), T_3^0(T_u = \infty)) = (35, 32, 00)$ . Therefore, go to Step 4 for  $k = 0$ .

**Step 4.**  $T_2^0(T_u) = 32 > T_2^{min}$ . Find  $\beta_0$ ,  $1 \leq \beta_0 \leq \beta$  such that  $T_2^0(T_u) = 32 = t_2^{10}$ . This implies that  $\beta_0 = 10$ . Next, go to Step 5 for  $\delta = 1$ .

**Step 5.** On solving the problem  $(TMP3)^{0(1)}(T_u = \infty)$  (Table 5), it comes out to be restricted feasible, therefore, proceed to Step 6.

Table 3.  $TMP(TMP2)^0$ 

|       | $D_1$      | $D_2$     | $D_3$      | $D_4$     | $D_5$     | $D_6$      | $D_7$     | $D_8$     | $a_i$ |
|-------|------------|-----------|------------|-----------|-----------|------------|-----------|-----------|-------|
| $S_1$ | (12)<br>00 | 03        | 12         | (2)<br>00 | 15        | (1)<br>00  | 00        | 00        | 15    |
| $S_2$ | 00         | 00        | (10)<br>00 | 00        | 00        | 00         | 03        | 00        | 10    |
| $S_3$ | 12         | 00        | 02         | (9)<br>07 | 00        | 11         | (3)<br>00 | 00        | 12    |
| $S_4$ | 00         | 00        | 00         | 00        | (6)<br>09 | 00         | 00        | 09        | 06    |
| $S_5$ | 00         | 27        | 17         | 00        | 00        | (13)<br>00 | 15        | (4)<br>00 | 17    |
| $S_6$ | (5)<br>00  | (3)<br>00 | (4)<br>00  | 00        | 00        | (8)<br>32  | 00        | 27        | 20    |
| $b_j$ | 12         | 05        | 13         | 06        | 09        | 20         | 08        | 07        |       |

**Step 6.** Here  $\delta = 1 = \delta^*$  and the problem  $(TMP3)^{0(1)}(T_u = \infty)$  is  $(TMP3)^1(T_u = \infty)$  whose optimal feasible solution yields the next triad  $(T1^1(T_u), T2^1(T_u), T3^1(T_u)) = (35, 27, 00)$ . Next repeating Step 3 to Step 6 for  $(T1^1(T_u), T2^1(T_u), T3^1(T_u)) = (35, 27, 00)$ , the next triad  $(T1^2(T_u), T2^2(T_u), T3^2(T_u)) = (35, 17, 00)$  is obtained from problem  $(TMP3)^{1(1)}(T_u)$  (or  $(TMP3)^2(T_u)$  renamed, Table 6). Further, on solving problems of collection  $(TMP3)^{2(\delta)}(T_u)$ ,  $\delta = 1, 2, \dots$  successively, the first restricted feasible problem comes out to be  $(TMP3)^{2(7)}(T_u)$  (or  $(TMP3)^3(T_u)$  renamed, Table 7) which yields the next triad  $(T1^3(T_u), T2^3(T_u), T3^3(T_u)) = (35, 2, 14)$ . Next, for the triad  $(T1^3(T_u), T2^3(T_u), T3^3(T_u)) = (35, 2, 14)$ , where  $T2^3(T_u) = t_2^{\alpha_3} = 2 = t_2^1$ , the corresponding problem  $(TMP3)^{3(1)}(T_u)$  (Table 8) is not restricted feasible. Also  $t_2^{\alpha_3-1} = t_2^0 = 0 = T2^{min}$ , therefore Step 7 follows which concludes that the current triad  $(T1^3(T_u), T2^3(T_u), T3^3(T_u)) = (35, 2, 14)$  is the last triad of the above sequence of triads and can be used as an initial proficient triad with respect to Phase-1 i.e.,  $(T1^{prof}(1), T2^{prof}(1), T3^{prof}(1)) = (35, 2, 14)$ .

Next, for finding a proficient triad with respect to Phase-1 under the restriction that Phase-1 time is strictly less than  $T1^{prof}(1) = 35$ , proceed to Step 2 for  $l = 1$  and obtain a sequence of triads, the last of which will be the required proficient triad.

Table 4.  $\text{TMTP}(\text{TMP3})^0(T_u = \infty)$  or  $(\text{TMP3})^0$ 

|       | $D_1$      | $D_2$     | $D_3$     | $D_4$     | $D_5$ | $D_6$      | $D_7$     | $D_8$     | $a_i$ |
|-------|------------|-----------|-----------|-----------|-------|------------|-----------|-----------|-------|
| $S_1$ | (10)<br>00 | (5)<br>00 | 00        | 00        | 00    | 32         | 08        | 42        | 15    |
| $S_2$ | 40         | 00        | 29        | 03        | 00    | (10)<br>00 | 00        | 00        | 10    |
| $S_3$ | (1)<br>00  | 21        | 00        | (6)<br>00 | 08    | (5)<br>00  | 00        | 24        | 12    |
| $S_4$ | (1)<br>00  | 05        | (5)<br>00 | 00        | 00    | 00         | 37        | 00        | 06    |
| $S_5$ | 29         | 00        | (8)<br>00 | (9)<br>19 | 00    | 14         | 00        | 00        | 17    |
| $S_6$ | 11         | 00        | 42        | 05        | 00    | (5)<br>00  | (8)<br>00 | (7)<br>00 | 20    |
| $b_j$ | 12         | 05        | 13        | 06        | 09    | 20         | 08        | 07        |       |

 Table 5.  $\text{TMTP}(\text{TMP3})^{0(1)}(T_u = \infty)$ 

|       | $D_1$      | $D_2$     | $D_3$     | $D_4$      | $D_5$ | $D_6$      | $D_7$     | $D_8$     | $a_i$ |
|-------|------------|-----------|-----------|------------|-------|------------|-----------|-----------|-------|
| $S_1$ | (11)<br>00 | 00        | 00        | (4)<br>00  | 00    | $M$        | $M$       | $M$       | 15    |
| $S_2$ | $M$        | 00        | $M$       | 03         | 00    | (10)<br>00 | 00        | 00        | 10    |
| $S_3$ | 00         | $M$       | 00        | (2)<br>00  | $M$   | (10)<br>00 | 00        | $M$       | 12    |
| $S_4$ | (1)<br>00  | $M$       | (5)<br>00 | 00         | 00    | 00         | $M$       | 00        | 06    |
| $S_5$ | $M$        | 00        | (8)<br>00 | (9)<br>$M$ | 00    | $M$        | 00        | 00        | 17    |
| $S_6$ | $M$        | (5)<br>00 | $M$       | (0)<br>$M$ | 00    | $M$        | (8)<br>00 | (7)<br>00 | 20    |
| $b_j$ | 12         | 05        | 13        | 06         | 09    | 20         | 08        | 07        |       |

Table 6.  $\text{TMTP}(\text{TMP3})^{1(1)}$ 

|       | $D_1$      | $D_2$ | $D_3$      | $D_4$      | $D_5$ | $D_6$      | $D_7$ | $D_8$     | $a_i$ |
|-------|------------|-------|------------|------------|-------|------------|-------|-----------|-------|
| $S_1$ | (9)<br>00  | 00    | 00         | (6)<br>00  | 00    | $M$        | 08    | $M$       | 15    |
| $S_2$ | $M$        | 00    | $M$        | 03         | 00    | (5)<br>00  | 00    | (5)<br>00 | 10    |
| $S_3$ | 00         | $M$   | 00         | 00         | 08    | (12)<br>00 | 00    | $M$       | 12    |
| $S_4$ | (3)<br>00  | 05    | 00         | 00         | 00    | (3)<br>00  | $M$   | 00        | 06    |
| $S_5$ | $M$        | 00    | (13)<br>00 | (2)<br>$M$ | 00    | $M$        | 00    | (2)<br>00 | 17    |
| $S_6$ | (5)<br>$M$ | 00    | $M$        | (7)<br>05  | 00    | (8)<br>$M$ | 00    | $M$       | 20    |
| $b_j$ | 12         | 05    | 13         | 06         | 09    | 20         | 08    | 07        |       |

 Table 7.  $\text{TMTP}(\text{TMP3})^{2(7)}(T_u = \infty)$ 

|       | $D_1$      | $D_2$     | $D_3$      | $D_4$     | $D_5$     | $D_6$      | $D_7$     | $D_8$     | $a_i$ |
|-------|------------|-----------|------------|-----------|-----------|------------|-----------|-----------|-------|
| $S_1$ | (12)<br>00 | $M$       | $M$        | (3)<br>00 | $M$       | $M$        | 08        | $M$       | 15    |
| $S_2$ | $M$        | 00        | $M$        | 03        | 00        | (10)<br>00 | $M$       | 00        | 10    |
| $S_3$ | $M$        | $M$       | (12)<br>00 | $M$       | 08        | $M$        | 00        | $M$       | 12    |
| $S_4$ | 00         | 05        | (1)<br>00  | 00        | $M$       | (5)<br>00  | $M$       | $M$       | 06    |
| $S_5$ | $M$        | $M$       | $M$        | $M$       | (5)<br>00 | (5)<br>14  | $M$       | (7)<br>00 | 17    |
| $S_6$ | 11         | (5)<br>00 | $M$        | (3)<br>05 | (4)<br>00 | $M$        | (8)<br>00 | $M$       | 20    |
| $b_j$ | 12         | 05        | 13         | 06        | 09        | 20         | 08        | 07        |       |

Table 8. TMTP  $(TMP3)^{3(1)}(T_u = \infty)$ 

|       | $D_1$     | $D_2$     | $D_3$     | $D_4$     | $D_5$     | $D_6$     | $D_7$     | $D_8$     | $a_i$ |
|-------|-----------|-----------|-----------|-----------|-----------|-----------|-----------|-----------|-------|
| $S_1$ | <u>00</u> | <u>M</u>  | <u>M</u>  | <u>00</u> | <u>M</u>  | <u>M</u>  | 08        | <u>M</u>  | 15    |
| $S_2$ | <u>M</u>  | <u>00</u> | <u>M</u>  | 03        | <u>00</u> | <u>00</u> | <u>M</u>  | <u>00</u> | 10    |
| $S_3$ | <u>M</u>  | <u>M</u>  | <u>M</u>  | <u>M</u>  | 08        | <u>M</u>  | <u>00</u> | <u>M</u>  | 12    |
| $S_4$ | <u>00</u> | 05        | <u>00</u> | <u>00</u> | <u>M</u>  | <u>00</u> | <u>M</u>  | <u>M</u>  | 06    |
| $S_5$ | <u>M</u>  | <u>M</u>  | <u>M</u>  | <u>M</u>  | <u>00</u> | 14        | <u>M</u>  | <u>00</u> | 17    |
| $S_6$ | 11        | <u>00</u> | <u>M</u>  | 05        | <u>00</u> | <u>M</u>  | <u>00</u> | <u>M</u>  | 20    |
| $b_j$ | 12        | 05        | 13        | 06        | 09        | 20        | 08        | 07        |       |

**Step 2.**  $T1^{prof}(1) = 35 > T1^{min}$ , therefore go to Step 3.

**Step 3.** Set  $T1^{prof}(1) = 35 = T_u$ . For finding the minimum shipment time for Phase-3 with respect to Phase-1 under the restriction that Phase-1 time is strictly less than  $T_u$ , solve the problem  $(TMP3)^0(T_u = 35)$  (Table 9) with time entries as

$$t'_{ij} = \begin{cases} M & \text{if } t_{ij} \geq 35 \text{ for } (i, j) \in P_1 \\ t_{ij} & (i, j) \in P_3 \\ 0 & \text{otherwise} \end{cases}$$

Table 9. TMTP  $(TMP3)^0(T_u = 35)$ 

|       | $D_1$             | $D_2$            | $D_3$            | $D_4$            | $D_5$            | $D_6$             | $D_7$            | $D_8$            | $a_i$ |
|-------|-------------------|------------------|------------------|------------------|------------------|-------------------|------------------|------------------|-------|
| $S_1$ | (10)<br><u>00</u> | (5)<br><u>00</u> | <u>00</u>        | <u>00</u>        | <u>00</u>        | 32                | 08               | 42               | 15    |
| $S_2$ | 40                | <u>00</u>        | 29               | 03               | <u>00</u>        | (2)<br><u>00</u>  | (8)<br><u>00</u> | <u>00</u>        | 10    |
| $S_3$ | (1)<br><u>00</u>  | 21               | <u>00</u>        | (6)<br><u>00</u> | 08               | (5)<br><u>00</u>  | <u>00</u>        | 24               | 12    |
| $S_4$ | (1)<br><u>00</u>  | 05               | (5)<br><u>00</u> | <u>00</u>        | <u>00</u>        | <u>00</u>         | 37               | <u>00</u>        | 06    |
| $S_5$ | 29                | <u>00</u>        | (8)<br><u>00</u> | 19               | (9)<br><u>00</u> | 14                | <u>00</u>        | <u>00</u>        | 17    |
| $S_6$ | 11                | <u>M</u>         | 42               | 05               | <u>00</u>        | (13)<br><u>00</u> | <u>M</u>         | (7)<br><u>00</u> | 20    |
| $b_j$ | 12                | 05               | 13               | 06               | 09               | 20                | 08               | 07               |       |

From an optimal feasible solution of  $(TMP3)^0(T_u = 35)$ , the first triad of this sequence is obtained as  $(T1^0(T_u), T2^0(T_u), T3^0(T_u)) = (17, 32, 00)$ .

Proceeding on the lines of algorithm from Step 3 to Step 7 repeatedly for every generated triad

Table 10. All proficient triads with respect to Phase-1

| Value of $l$  | Triad recorded | $T1^{prof}(1) + T2^{prof}(1) + T3^{prof}(1)$ |
|---------------|----------------|----------------------------------------------|
| 1             | (35,02,14)     | 51                                           |
| 2             | (27,02,14)     | 43                                           |
| 3             | (17,32,00)     | 49                                           |
| 4             | (09,32,00)     | 41                                           |
| 5             | (08,32,00)     | 40                                           |
| 6             | (06,32,00)     | 38                                           |
| 7             | (04,27,14)     | 45                                           |
| 8= $v$ (last) | (00,27,14)     | 41                                           |

$(T1^k(T_u), T2^k(T_u), T3^k(T_u))$ , a sequence of triads is obtained as follows.

$$\begin{aligned}
(T1^0(T_u), T2^0(T_u), T3^0(T_u)) &= (17, 32, 00) \\
(T1^1(T_u), T2^1(T_u), T3^1(T_u)) &= (27, 17, 11) \\
(T1^2(T_u), T2^2(T_u), T3^2(T_u)) &= (27, 15, 11) \\
(T1^3(T_u), T2^3(T_u), T3^3(T_u)) &= (27, 3, 14) \\
(T1^4(T_u), T2^4(T_u), T3^4(T_u)) &= (27, 02, 14) = (T1^{prof}(2), T2^{prof}(2), T3^{prof}(2)) \\
&= \text{proficient triad with respect to Phase} - 1
\end{aligned}$$

Repeating Step 2 to Step 7 for  $l = 2$ , the next proficient triad with respect to Phase-1 under the restriction that Phase-1 time is strictly less than  $T1^{prof}(2) = 27$  is obtained as  $(17, 32, 00) = (T1^{prof}(3), T2^{prof}(3), T3^{prof}(3))$ .

Continuing so on, the recorded proficient triads with respect to Phase-1 are as given in Table 10.

**Step 13.** The optimal value of 3-PhTP(ex1) is

$$\min_{\{l=1,2,\dots,v\}} [T1^{prof}(l) + T2^{prof}(l) + T3^{prof}(l)] = 38$$

The corresponding triad  $(T1^{prof}(6), T2^{prof}(6), T3^{prof}(6)) = (06, 32, 00)$  is an optimal triad for 3-PhTP(ex1).

### ***Solving 3-PhTP(ex1) by generating all proficient triads with respect to Phase-2:***

In order to find proficient triads with respect to Phase-2, start with the triad corresponding to Phase-3 minimum time, i.e (35,32,00) as in above case, but search for the triads having minimum sum of Phase-1 and Phase-3 times corresponding to Phase-2 time.

For obtaining first proficient triad with respect to Phase-2 from the triad (35,32,00), a sequence of intermediate triads is obtained such that Phase-1 time decreases and corresponding minimum time of Phase-3 increases in such a way that the sum of Phase-1 and Phase-3 times decreases strictly. The last triad of such a sequence is the required first proficient triad with respect to Phase-2.

Proceeding on these lines, the first proficient triad with respect to Phase-2 is obtained as (06,32,00). The sequence of intermediate triads generated in obtaining first proficient triad (06,32,00) is as follows.

$$(35,32,00); (17,32,00); (09,32,00); (08,32,00); (06,32,00) = (T1^{prof}(1), T2^{prof}(1), T3^{prof}(1))$$

Next, to find proficient triad with respect to Phase-2 under the restriction that Phase-2 time

Table 11. All intermediate and proficient triads with respect to Phase-2 for 3-PhTP(ex1)

| Value of $l$  | sequence of intermediate triads                                                                                     | $l$ -th proficient triad<br>( $T1^{prof}(l), T2^{prof}(l), T3^{prof}(l)$ ) | $T1^{prof}(1)$ +<br>$T2^{prof}(1)$ +<br>$T3^{prof}(1)$ |
|---------------|---------------------------------------------------------------------------------------------------------------------|----------------------------------------------------------------------------|--------------------------------------------------------|
| 1             | (35,32,00);<br>(17,32,00);<br>(09,32,00);<br>(08,32,00);<br>(06,32,00)                                              | (06,32,00)                                                                 | 38                                                     |
| 2             | (35,27,00);<br>(27,27,05);<br>(17,27,11);<br>(09,27,14);<br>(08,27,14);<br>(06,27,14);<br>(04,27,14);<br>(00,27,14) | (00,27,14)                                                                 | 41                                                     |
| 3             | (35,17,00)                                                                                                          | (35,17,00)                                                                 | 52                                                     |
| 4             | (35,15,11);<br>(27,15,11)                                                                                           | (27,15,11)                                                                 | 53                                                     |
| 5             | (35,12,14);<br>(27,12,14)                                                                                           | (27,12,14)                                                                 | 53                                                     |
| 6             | (27,03,14)                                                                                                          | (27,03,14)                                                                 | 44                                                     |
| 7             | (35,02,14);<br>(27,02,14)                                                                                           | (27,02,14)                                                                 | 43                                                     |
| 8= $v$ (last) | (35,00,29);<br>(27,00,29);<br>(13,00,42);<br>(00,00,42)                                                             | (00,00,42)                                                                 | 42                                                     |

is strictly less than  $T2^{prof}(1) = 32$ . Table 11 records all proficient triads with respect to Phase-2 and intermediate triads generated while obtaining proficient triads.

Clearly, the optimal value of 3-PhTP(ex1) is

$$\min_{\{l=1,2,\dots,v\}} [T1^{prof}(l) + T2^{prof}(l) + T3^{prof}(l)] = 38$$

and the corresponding triad  $(T1^{prof}(1), T2^{prof}(1), T3^{prof}(1)) = (06, 32, 00)$  is an optimal triad for 3-PhTP(ex1), which is same as obtained in earlier case where proficient triads with respect to Phase-1 are generated.

***Solving 3-PhTP(ex1) by generating all proficient triads with respect to Phase-3:***

In order to find proficient triads with respect to Phase-3, start with the triad corresponding to Phase-1 or Phase-2 minimum time and search for the triads having minimum sum of Phase-1 and Phase-2 times corresponding to Phase-3 time.

Table 12. All intermediate and proficient triads with respect to Phase-3 for 3-PhTP(ex1)

| Value of $l$   | sequence of intermediate triads                                                                      | $l$ -th proficient triad<br>( $T1^{prof}(l), T2^{prof}(l), T3^{prof}(l)$ ) | $T1^{prof}(1)$ +<br>$T2^{prof}(1)$ +<br>$T3^{prof}(1)$ |
|----------------|------------------------------------------------------------------------------------------------------|----------------------------------------------------------------------------|--------------------------------------------------------|
| 1              | (35,00,42);<br>(13,00,42);<br>(04,00,42);<br>(00,00,42)                                              | (00,00,42)                                                                 | 42                                                     |
| 2              | (35,00,32);<br>(27,00,32)                                                                            | (27,00,32)                                                                 | 59                                                     |
| 3              | (35,00,29);<br>(27,00,29)                                                                            | (27,00,29)                                                                 | 56                                                     |
| 4              | (35,00,24);<br>(27,02,21);<br>(00,27,24)                                                             | (00,27,24)                                                                 | 51                                                     |
| 5              | (35,02,21);<br>(27,02,21);<br>(00,27,14)                                                             | (00,27,14)                                                                 | 41                                                     |
| 6              | (35,15,11);<br>(27,15,11);<br>(09,32,11);<br>(08,32,11);<br>(06,32,11)                               | (06,32,11)                                                                 | 49                                                     |
| 7              | (35,17,05);<br>(17,32,08);<br>(15,32,08);<br>(13,32,08);<br>(09,32,08);<br>(08,32,08);<br>(06,32,08) | (06,32,08)                                                                 | 46                                                     |
| 8              | (35,17,05);<br>(17,32,05);<br>(15,32,05);<br>(13,32,05);<br>(09,32,05);<br>(08,32,05);<br>(06,32,05) | (06,32,05)                                                                 | 43                                                     |
| 9              | (35,17,00);<br>(17,32,03);<br>(15,32,03);<br>(13,32,03);<br>(09,32,03);<br>(08,32,00);<br>(06,32,03) | (06,32,03)                                                                 | 41                                                     |
| 10= $v$ (last) | (35,17,00);<br>(17,32,00);<br>(13,32,00);<br>(08,32,00);<br>(06,32,00)                               | (06,32,00)                                                                 | 38                                                     |

For 3-PhTP(ex1), start with the triad (35, 00, 42) corresponding to Phase-2 minimum time obtained by solving TMTP  $(TMP2)^0$  and obtain first proficient triad with respect to Phase-3. A sequence of intermediate triads is obtained, starting from (35, 00, 42) such that Phase-1 time decreases and corresponding minimum time of Phase-2 increases in such a way that the sum of Phase-1 and Phase-2 times also decreases strictly. The last triad of such a sequence is the required first proficient triad with respect to Phase-3.

Proceeding on these lines, the first proficient triad with respect to Phase-3 is obtained as  $(00, 00, 42) = (T1^{prof}(1), T2^{prof}(1), T3^{prof}(1))$ .

Next, to find proficient triad with respect to Phase-3 under the restriction that Phase-3 time is strictly less than  $T3^{prof}(1) = 42$ . Table 12 records all proficient triads with respect to Phase-3 and all intermediate triads generated while obtaining proficient triads.

Clearly, the optimal value of 3-PhTP(ex1) is

$$\min_{\{l=1,2,\dots,v\}} [T1^{prof}(l) + T2^{prof}(l) + T3^{prof}(l)] = 38$$

and the corresponding triad  $(T1^{prof}(10), T2^{prof}(10), T3^{prof}(10)) = (06, 32, 00)$  is an optimal triad for 3-PhTP(ex1), which is same as obtained in two cases before.

**Example 2.** Consider a larger 3-PhTP (namely 3-PhTP(ex2) as in Table 13) with number of origins as  $m = 10$  and number of terminals as  $n = 10$ . Here, cells with underlined entries denote Phase-1 links, cells with encircled entries denote Phase-2 links and remaining cells correspond to Phase-3 links.

Table 13. 3-PhTP(ex2)

|          | $D_1$     | $D_2$     | $D_3$     | $D_4$     | $D_5$     | $D_6$     | $D_7$     | $D_8$     | $D_9$     | $D_{10}$  | $a_i$ |
|----------|-----------|-----------|-----------|-----------|-----------|-----------|-----------|-----------|-----------|-----------|-------|
| $S_1$    | (21)      | <u>10</u> | <u>48</u> | 19        | (31)      | <u>58</u> | 43        | (39)      | 60        | <u>29</u> | 05    |
| $S_2$    | <u>29</u> | 43        | (21)      | 09        | <u>35</u> | (12)      | <u>58</u> | 28        | <u>10</u> | (45)      | 12    |
| $S_3$    | 60        | (45)      | <u>17</u> | (12)      | <u>58</u> | 19        | 43        | <u>17</u> | (45)      | <u>10</u> | 20    |
| $S_4$    | <u>35</u> | (12)      | 60        | <u>29</u> | 28        | (31)      | <u>10</u> | 09        | (39)      | <u>48</u> | 14    |
| $S_5$    | (45)      | <u>35</u> | 09        | (61)      | 19        | <u>29</u> | (31)      | <u>58</u> | <u>17</u> | (21)      | 18    |
| $S_6$    | <u>10</u> | (39)      | <u>29</u> | (39)      | 43        | (61)      | 28        | 60        | (12)      | 19        | 21    |
| $S_7$    | 09        | <u>48</u> | (31)      | (12)      | <u>10</u> | 28        | (45)      | <u>58</u> | 43        | <u>35</u> | 07    |
| $S_8$    | (12)      | 28        | <u>58</u> | <u>35</u> | (21)      | 09        | 60        | 19        | <u>29</u> | (61)      | 25    |
| $S_9$    | 19        | <u>48</u> | 28        | (21)      | 43        | <u>10</u> | 09        | (45)      | 43        | <u>17</u> | 15    |
| $S_{10}$ | (31)      | <u>17</u> | <u>35</u> | <u>48</u> | (12)      | 60        | <u>29</u> | (21)      | 09        | (39)      | 06    |
| $b_j$    | 18        | 07        | 14        | 06        | 21        | 12        | 20        | 12        | 06        | 27        |       |

The distinct time entries in three phases arranged in increasing order are as follows.

**Phase-1:**  $t_1^1(= 10) < t_1^2(= 17) < t_1^3(= 29) < t_1^4(= 35) < t_1^5(= 48) < t_1^6(= 58) = t_1^\alpha$ ;  $\alpha = 06$

**Phase-2:**  $t_2^1(= 12) < t_2^2(= 21) < t_2^3(= 31) < t_2^4(= 39) < t_2^5(= 45) < t_2^6(= 61) = t_2^\beta$ ;  $\beta = 06$

**Phase-3:**  $t_3^1(= 09) < t_3^2(= 19) < t_3^3(= 28) < t_3^4(= 43) < t_3^5(= 60)$ ;  $\gamma = 05$

On solving the standard TMTPs  $(TMP1)^0$ ,  $(TMP2)^0$  and  $(TMP3)^0$ , the minimum shipment times of Phase-1, Phase-2 and Phase-3 are obtained as follows.

$$T1^{min} = 0, T2^{min} = 0 \text{ and } T3^{min} = 0$$

Proceeding on the lines of algorithm as in Example 1, all intermediate and proficient triads with respect to Phase-1 are recorded in Table 14.

The optimal value of 3-PhTP(ex2) is

$$\min_{\{l=1,2,\dots,v\}} [T1^{prof}(l) + T2^{prof}(l) + T3^{prof}(l)] = 40$$

and the corresponding triad  $(T1^{prof}(6), T2^{prof}(6), T3^{prof}(6)) = (10, 21, 09)$  is an optimal triad for 3-PhTP(ex2).

Table 14. All intermediate and proficient triads with respect to Phase-1 for 3-PhTP(ex2)

| Value of $l$ | sequence of intermediate triads                                                                      | $l$ -th proficient triad<br>( $T1^{prof}(l), T2^{prof}(l), T3^{prof}(l)$ ) | $T1^{prof}(1)$ +<br>$T2^{prof}(1)$ +<br>$T3^{prof}(1)$ |
|--------------|------------------------------------------------------------------------------------------------------|----------------------------------------------------------------------------|--------------------------------------------------------|
| 1            | (58,61,00);<br>(58,45,00);<br>(58,39,00);<br>(58,31,00);<br>(58,21,00);<br>(58,00,09)                | (58,00,09)                                                                 | 67                                                     |
| 2            | (35,61,00);<br>(35,45,00);<br>(48,39,00);<br>(48,21,00);<br>(48,00,19)                               | (48,00,19)                                                                 | 67                                                     |
| 3            | (35,61,00);<br>(35,45,00);<br>(29,39,00);<br>(35,31,00);<br>(35,21,00);<br>(35,00,19)                | (35,00,19)                                                                 | 54                                                     |
| 4            | (29,61,00);<br>(29,45,00);<br>(29,39,00);<br>(29,31,00);<br>(29,21,09);<br>(29,00,28);<br>(29,00,19) | (29,00,19)                                                                 | 48                                                     |
| 5            | (17,61,00);<br>(17,45,00);<br>(17,39,00);<br>(17,21,09)                                              | (17,21,09)                                                                 | 47                                                     |
| 6            | (10,61,00);<br>(10,45,00);<br>(10,31,09);<br>(10,21,09)                                              | (10,21,09)                                                                 | 40                                                     |
| $7=v$ (last) | (00,61,19);<br>(00,45,19)                                                                            | (00,45,19)                                                                 | 64                                                     |
